# Supplementary material for: Photocatalytic degradation of ciprofloxacin and metformin in a continuous-flow tubular reactor
Source: Royal Society of Chemistry journal article supplement (doi:10.1039/d5re00021a), 2025-01-01
Supplement: d5re00021a1.pdf [file d5re00021a1.pdf]

## SUPPLEMENTARY INFORMATION

### Photocatalytic degradation of Ciprofloxacin and Metformin in a continuous-flow tubular reactor

Rahul Binjhade,<sup>a</sup> Raka Mondal<sup>b</sup> and Sourav Mondal<sup>\*a</sup>

#### DATASET FOR FIGURES

Data for Fig. 7:

| Table S1: Concentration of Ciprofloxacin and Metformin over time in single drug and drug mixture experiments in the presence of photocatalyst under UV irradiation. |                                                        |                                                        |                                                       |                                                       |
|---------------------------------------------------------------------------------------------------------------------------------------------------------------------|--------------------------------------------------------|--------------------------------------------------------|-------------------------------------------------------|-------------------------------------------------------|
| Time (hr)                                                                                                                                                           | Concentration of CIP in drug mixture experiment (mg/L) | Concentration of MET in drug mixture experiment (mg/L) | Concentration of CIP in single drug experiment (mg/L) | Concentration of MET in single drug experiment (mg/L) |
| 0                                                                                                                                                                   | 1 (±0.1)                                               | 1 (±0.1)                                               | 1 (±0.1)                                              | 1 (±0.1)                                              |
| 1                                                                                                                                                                   | 0.57 (±0.057)                                          | 0.63 (±0.063)                                          | 0.64 (±0.064)                                         | 0.63 (±0.063)                                         |
| 3                                                                                                                                                                   | 0.44 (±0.044)                                          | 0.34 (±0.034)                                          | 0.51 (±0.051)                                         | 0.35 (±0.035)                                         |
| 5                                                                                                                                                                   | 0.33 (±0.033)                                          | 0.26 (±0.026)                                          | 0.35 (±0.035)                                         | 0.22 (±0.022)                                         |
| 7                                                                                                                                                                   | 0.25 (±0.025)                                          | 0.18 (±0.018)                                          | 0.26 (±0.026)                                         | 0.135 (±0.0135)                                       |
| 9                                                                                                                                                                   | 0.15 (±0.015)                                          | 0.08 (±0.008)                                          | 0.078 (±0.0078)                                       | 0.082 (±0.0082)                                       |

Data for Fig. 8:

| Table S1: Concentration of Ciprofloxacin and Metformin over time in single drug and drug mixture experiments in the absence of photocatalyst under UV irradiation (only photolysis). |                                                        |                                                        |                                                       |                                                       |
|--------------------------------------------------------------------------------------------------------------------------------------------------------------------------------------|--------------------------------------------------------|--------------------------------------------------------|-------------------------------------------------------|-------------------------------------------------------|
| Time (hr)                                                                                                                                                                            | Concentration of CIP in drug mixture experiment (mg/L) | Concentration of MET in drug mixture experiment (mg/L) | Concentration of CIP in single drug experiment (mg/L) | Concentration of MET in single drug experiment (mg/L) |
| 0                                                                                                                                                                                    | 1 (±0.1)                                               | 1 (±0.1)                                               | 1 (±0.1)                                              | 1 (±0.1)                                              |
| 2                                                                                                                                                                                    | 0.73 (±0.073)                                          | 0.75 (±0.075)                                          | 0.79 (±0.079)                                         | 0.81 (±0.081)                                         |
| 4                                                                                                                                                                                    | 0.71 (±0.071)                                          | 0.69 (±0.069)                                          | 0.65 (±0.065)                                         | 0.67 (±0.067)                                         |
| 6                                                                                                                                                                                    | 0.67 (±0.067)                                          | 0.66 (±0.066)                                          | 0.54 (±0.054)                                         | 0.5 (±0.05)                                           |
| 8                                                                                                                                                                                    | 0.65 (±0.065)                                          | 0.64 (±0.064)                                          | 0.5 (±0.05)                                           | 0.42 (±0.042)                                         |

Data for Fig. 9:

| Table S3: Total organic carbon (TOC) analysis of photocatalytic degradation of ciprofloxacin and metformin. |                                                            |                                                       |                                                                |
|-------------------------------------------------------------------------------------------------------------|------------------------------------------------------------|-------------------------------------------------------|----------------------------------------------------------------|
| Time (hr)                                                                                                   | TOC values, of ciprofloxacin degradation experiment (mg/L) | TOC values in Metformin degradation experiment (mg/L) | TOC values of mixture in mixture degradation experiment (mg/L) |
| 0                                                                                                           | 1.577 (±0.1577)                                            | 1.144 (±0.1144)                                       | 2.792 (±0.2792)                                                |
| 3                                                                                                           | 0.7775 (±0.07775)                                          | 0.9237 (±0.09237)                                     | 2.154 (±0.2154)                                                |
| 9                                                                                                           | 0.7263 (±0.07263)                                          | 0.331 (±0.0331)                                       | 0.951 (±0.0951)                                                |

<sup>a</sup> Department of Chemical Engineering, Indian Institute of Technology Kharagpur, Kharagpur 721302, India. e-mail: [rahulbinjhade@gmail.com](mailto:rahulbinjhade@gmail.com)

<sup>b</sup> Department of Chemical Engineering, Indian Institute of Petroleum & Energy, Visakhapatnam 530003, India, e-mail: [rakam.che@iipe.ac.in](mailto:rakam.che@iipe.ac.in)

<sup>\*</sup> corresponding author, e-mail: [smondal@che.iitkgp.ac.in](mailto:smondal@che.iitkgp.ac.in)

† Footnotes relating to the title and/or authors should appear here.

Supplementary Information available: [details of any supplementary information available should be included here]. See DOI: 10.1039/x0xx00000x
